# Supplementary material for: Estimating heritability and genetic correlations from large health datasets in the absence of genetic data
Source: PubMed Central journal article supplement (PMC6890770; doi:10.1038/s41467-019-13455-0), 2019-12-03
Supplement: 41467_2019_13455_MOESM9_ESM.pdf [file 41467_2019_13455_MOESM9_ESM.pdf]

**Title:** Supplementary Data 1.

**Description:** A list of previously-published and our model-predicted heritability values.

**Title:** Supplementary Data 2.

**Description:** A list of previously-published and our model-predicted correlation values.

**Title:** Supplementary Data 3.

**Description:** Comparison of heritability estimates from an independent study and from our model prediction.

**Title:** Supplementary Data 4.

**Description:** Separate comparisons of heritability estimates for acute and chronic diseases, from an independent study and from our model prediction.

**Title:** Supplementary Data 5.

**Description:** Comparison of genetic correlation estimates from an independent study and from our model prediction.

**Title:** Supplementary Data 6.

**Description:** Multi-variable Regression Analysis between Shape-of-cure Dissimilarity ( $D_{soc}$ ) and Correlation Estimates of  $r_g$  and  $r_e$ , as well as Their Interaction Term (related to Fig. 4d and Supplementary Fig. 5):  $D_{soc} = A r_g + B r_e + C r_g \cdot r_e + D_0$

**Title:** Supplementary Data 7.

**Description:** A List of Disease Phenotypes, Grouped into Disease Categories (**Underlined Bold Texts**) and Sorted in Alphabetical Order
